# Supplementary material
Source: MDPI journal article supplement (https://www.mdpi.com/2072-4292/16/6/1103)
Supplement: s1 [file s1]

## Supplementary Materials

# Evaluation and Refinement of Chlorophyll-a Algorithms for High-Biomass Blooms in San Francisco Bay (USA)

Raphael M. Kudela <sup>1,\*</sup>, David B. Senn <sup>2</sup>, Emily T. Richardson <sup>3</sup>, Keith Bouma-Gregson <sup>3</sup>, Brian A. Bergamaschi <sup>3</sup> and Lawrence Sim <sup>2</sup>

<sup>1</sup> Ocean Sciences Department, University of California Santa Cruz, Santa Cruz, CA 95064, USA

<sup>2</sup> San Francisco Estuary Institute, 4911 Central Avenue, Richmond, CA 94804, USA; [davids@sfei.org](mailto:davids@sfei.org) (D.B.S.); [lawrences@sfei.org](mailto:lawrences@sfei.org) (L.S.)

<sup>3</sup> USGS California Water Science Center, 6000 J Street, Sacramento, CA 95819, USA; [erichardson@usgs.gov](mailto:erichardson@usgs.gov) (E.T.R.); [kbouma-gregson@usgs.gov](mailto:kbouma-gregson@usgs.gov) (K.B.-G.); [bbergama@usgs.gov](mailto:bbergama@usgs.gov) (B.A.B.)

\* Correspondence: [kudela@ucsc.edu](mailto:kudela@ucsc.edu); Tel.: +1-831-459-3290

Any use of trade, firm, or product names is for descriptive purposes only and does not imply endorsement by the U.S. Government.

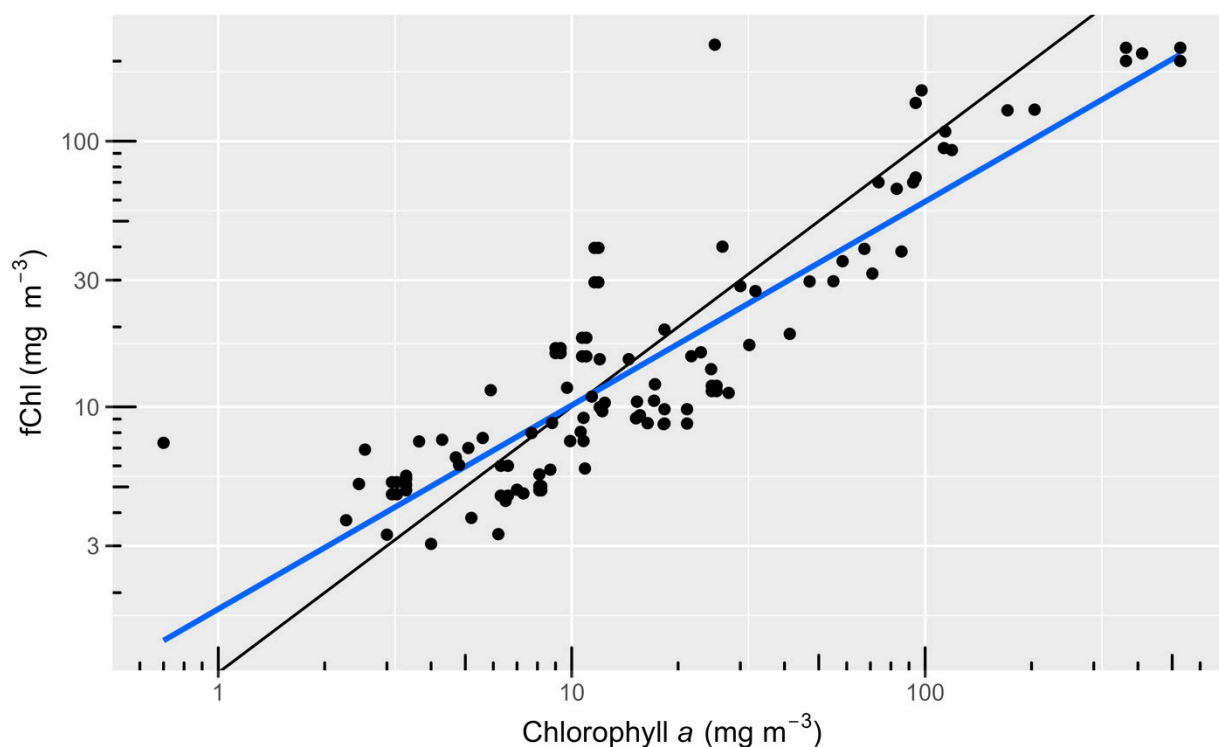

**Figure S1.** Comparison of discrete chlorophyll *a* concentrations (log10 scaled) compared with high resolution underway chlorophyll fluorescence (fChl) concentrations (log10 scaled) from a YSI EXO2 sonde. The average fChl concentration was calculated by averaging the fChl concentration  $\pm$  2 minutes from the time of discrete sample collection. The 1:1 line is given in black, and the blue line shows a simple linear regression (slope = 0.767, intercept = 0.239, adj.  $r^2$  = 0.77). The bias [30] was 0.914, meaning fChl concentrations are on average 8.6% below discrete concentrations.

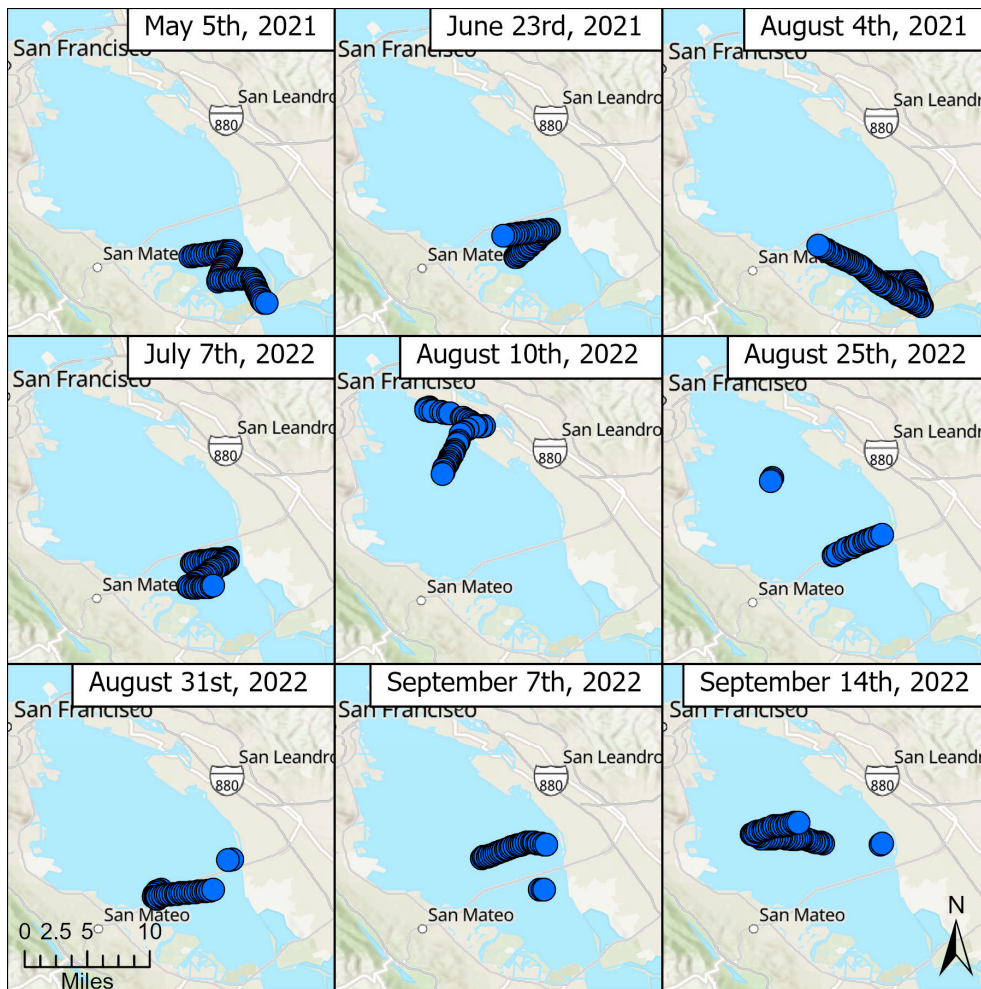

**Figure S2.** Map depicting the 426 underway mapping data points used as matchups for algorithm testing. Data are represented by blue circles and presented by date of collection.

**Table S1.** Satellite imagery used in the analysis. Data are publicly available at: <https://dataspace.copernicus.eu/>.

| Filename                                                                                       |
|------------------------------------------------------------------------------------------------|
| S3A_OL_1_EFR____20210505T183341_20210505T183641_20210506T230027_0179_071_241_2340_LN1_O_NT_002 |
| S3B_OL_1_EFR____20210623T182414_20210623T182714_20210624T225631_0179_054_027_2340_LN1_O_NT_002 |
| S3B_OL_1_EFR____20210804T183529_20210804T183829_20210805T231621_0180_055_241_2340_LN1_O_NT_002 |
| S3A_OL_1_EFR____20220707T183725_20220707T184025_20220708T190326_0179_087_184_2340_PS1_O_NT_002 |
| S3B_OL_1_EFR____20220810T181655_20220810T181955_20220811T085145_0179_069_141_2340_PS2_O_NT_002 |
| S3B_OL_1_EFR____20220825T182809_20220825T183109_20220826T090206_0179_069_355_2340_PS2_O_NT_002 |
| S3A_OL_1_EFR____20220831T181109_20220831T181409_20220901T184830_0179_089_198_2340_PS1_O_NT_002 |
| S3A_OL_1_EFR____20220907T182953_20220907T183253_20220908T190831_0179_089_298_2340_PS1_O_NT_003 |
| S3B_OL_1_EFR____20220914T180925_20220914T181225_20220915T090916_0179_070_255_2340_PS2_O_NT_003 |

**Table S2.** Discrete (DS) chlorophyll *a* (*chl**a*) and high resolution underway chlorophyll fluorescence (fChl) concentrations. fChl mean, max, and min are calculated from +/- 2 minutes from the time of discrete sample collection. NWIS = USGS National Water Information System [45].

| id | Timestamp<br>(PST) DS | fChl (µg/L)<br>(EXO) HR | NWIS site_no    | <i>Chla</i><br>(µg/L)<br>DS | fChl<br>mean | fChl<br>max | fChl<br>min |
|----|-----------------------|-------------------------|-----------------|-----------------------------|--------------|-------------|-------------|
| 1  | 9/7/2022 9:30         | 9.626985                | 373642122120401 | 15.4                        | 9.16941      | 9.776433    | 8.033294    |
| 2  | 9/14/2022 10:10       | 11.01298                | 373924122185901 | 24.9                        | 12.01038     | 13.83221    | 11.01298    |
| 2  | 9/14/2022 10:11       | 11.16228                | 373924122185901 | 25.7                        | 12.01038     | 13.83221    | 11.01298    |
| 3  | 9/14/2022 10:10       | 11.01298                | 373924122185901 | 24.9                        | 11.46295     | 12.39348    | 10.97107    |
| 3  | 9/14/2022 10:11       | 11.16228                | 373924122185901 | 25.7                        | 11.46295     | 12.39348    | 10.97107    |
| 4  | 9/14/2022 9:29        | 8.017126                | 373751122143601 | 15.3                        | 10.46187     | 18.62455    | 7.076764    |
| 4  | 9/14/2022 9:29        | 8.017126                | 373751122143601 | 15.3                        | 10.46187     | 18.62455    | 7.076764    |
| 5  | 9/14/2022 9:43        | 4.697324                | 373833122115901 | 7                           | 4.88001      | 5.251291    | 4.581786    |
| 6  | 9/7/2022 10:42        | 15.1359                 | 373847122095001 | 14.5                        | 15.12321     | 17.66434    | 13.14596    |
| 7  | 9/14/2022 11:03       | 2.74072                 | 374856122210301 | 6.2                         | 3.319729     | 4.834621    | 2.693703    |
| 8  | 9/7/2022 12:50        | 4.611347                | 374856122210301 | 5.2                         | 3.822175     | 4.816404    | 2.363278    |
| 9  | 9/7/2022 11:02        | 17.95217                | 373915122141501 | 55                          | 29.71087     | 59.87423    | 17.95217    |
| 10 | 9/7/2022 9:13         | 9.934163                | 11162765        | 16.4                        | 8.684366     | 10.96561    | 5.762269    |
| 10 | 9/7/2022 9:13         | 9.934163                | 11162765        | 16.4                        | 8.684366     | 10.96561    | 5.762269    |
| 11 | 9/7/2022 11:37        | 12.63805                | 373924122185901 | 24.8                        | 13.87086     | 20.06068    | 11.40478    |
| 12 | 9/7/2022 12:10        | 31.63133                | 374027122130401 | 30                          | 28.48071     | 33.70915    | 25.24398    |
| 13 | 9/14/2022 7:44        | 7.665071                | 373203122080901 | 10.6                        | 8.05547      | 8.99184     | 7.443698    |
| 14 | 9/7/2022 10:15        | 8.914204                | 373751122143601 | 18.3                        | 9.803071     | 14.45646    | 7.781261    |
| 14 | 9/7/2022 10:16        | 8.477903                | 373751122143601 | 21.2                        | 9.803071     | 14.45646    | 7.781261    |
| 15 | 9/7/2022 10:15        | 8.914204                | 373751122143601 | 18.3                        | 8.658946     | 11.78766    | 7.781261    |
| 15 | 9/7/2022 10:16        | 8.477903                | 373751122143601 | 21.2                        | 8.658946     | 11.78766    | 7.781261    |
| 16 | 8/25/2022 8:08        | 68.20057                | 373203122080901 | 73.8                        | 70.03829     | 84.73086    | 57.46177    |
| 17 | 9/14/2022 9:58        | 9.113492                | 373920122155201 | 18.2                        | 8.61105      | 10.30608    | 4.792858    |
| 18 | 9/7/2022 11:23        | 9.800205                | 373920122155201 | 21.8                        | 15.51565     | 29.46187    | 8.73859     |
| 19 | 8/25/2022 11:00       | 162.6569                | 373640122170101 | 171                         | 130.6213     | 220.4911    | 48.52581    |
| 20 | 9/14/2022 8:04        | 17.06514                | 373401122092201 | 23.2                        | 16.05147     | 18.23747    | 9.53399     |
| 21 | 9/14/2022 8:27        | 18.06566                | 373540122094301 | 31.8                        | 17.10041     | 19.25423    | 15.20821    |
| 21 | 9/14/2022 8:27        | 18.06566                | 373540122094301 | 31.8                        | 17.10041     | 19.25423    | 15.20821    |
| 22 | 8/25/2022 8:29        | 69.05403                | 373158122102701 | 94                          | 72.99636     | 102.5214    | 53.51374    |
| 23 | 8/25/2022 9:30        | 31.48992                | 373540122094301 | 47.1                        | 29.65553     | 37.15883    | 23.37332    |
| 24 | 9/7/2022 8:26         | 10.11179                | 373401122092201 | 12.4                        | 10.3661      | 11.84882    | 9.440953    |
| 25 | 8/25/2022 10:16       | 33.69404                | 373642122120401 | 67.3                        | 39.33693     | 69.95744    | 29.70326    |
| 26 | 8/25/2022 11:18       | 98.60987                | 373751122143601 | 119                         | 92.59497     | 110.4196    | 67.55761    |
| 27 | 8/25/2022 8:50        | 27.79889                | 373401122092201 | 33.1                        | 27.28483     | 49.95581    | 21.23738    |
| 28 | 8/25/2022 9:07        | 60.69761                | 373336122122501 | 92.5                        | 69.9638      | 109.9382    | 53.4205     |
| 29 | 9/7/2022 10:04        | 9.018913                | 373640122170101 | 17.1                        | 10.54827     | 16.80017    | 8.944884    |
| 29 | 9/7/2022 10:04        | 9.018913                | 373640122170101 | 17.1                        | 10.54827     | 16.80017    | 8.944884    |
| 30 | 8/31/2022 7:46        | 11.33953                | 373924122185901 | 9.7                         | 11.80415     | 12.07018    | 11.33441    |
| 31 | 8/25/2022 13:30       | 33.45512                | 374856122210301 | 85.7                        | 38.44591     | 45.16479    | 29.61711    |
| 32 | 8/31/2022 12:00       | 5.443788                | 373015122071000 | 3.4                         | 5.507587     | 6.206013    | 5.102811    |
| 33 | 9/14/2022 8:51        | 9.151106                | 373642122120401 | 12                          | 9.971612     | 13.34866    | 7.144815    |

|    |                 |          |                 |      |          |          |          |
|----|-----------------|----------|-----------------|------|----------|----------|----------|
| 34 | 8/25/2022 10:35 | 78.88358 | 373739122093101 | 83.1 | 66.18366 | 104.3358 | 45.85625 |
| 35 | 8/25/2022 9:48  | 105.8661 | 11162765        | 113  | 94.16951 | 115.6301 | 63.39152 |
| 36 | 8/31/2022 10:40 | 5.772859 | 373336122122501 | 4.8  | 6.047305 | 8.1367   | 5.177572 |
| 37 | 8/31/2022 8:55  | 10.08212 | 373640122170101 | 8.8  | 8.704876 | 10.27773 | 4.64775  |
| 38 | 8/31/2022 13:27 | 4.881522 | 374037122111101 | 3.4  | 4.856927 | 8.317021 | 3.649172 |
| 39 | 8/31/2022 7:16  | 5.736101 | 374027122130401 | 2.6  | 6.907082 | 13.03273 | 5.308771 |
| 40 | 9/14/2022 10:30 | 13.74177 | 374027122130401 | 12   | 15.11612 | 18.1157  | 13.00815 |
| 41 | 8/31/2022 8:22  | 8.046536 | 373847122095001 | 4.3  | 7.523143 | 8.69787  | 4.246253 |
| 42 | 8/25/2022 12:00 | 171.4154 | 373920122155201 | 97.7 | 155.2854 | 232.3521 | 69.36987 |
| 43 | 7/7/2022 8:20   | 4.720644 | 373924122185901 | 6.5  | 4.429919 | 4.988207 | 3.945638 |
| 44 | 9/14/2022 8:12  | 8.576747 | 373336122122501 | 10.8 | 9.094496 | 10.74986 | 8.067895 |
| 45 | 9/14/2022 9:17  | 10.86515 | 373640122170101 | 15.6 | 9.304603 | 11.01664 | 8.171092 |
| 46 | 9/14/2022 7:27  | 7.30118  | 373015122071000 | 0.7  | 7.325765 | 7.944568 | 6.85655  |
| 47 | 8/25/2022 7:28  | 132.5899 | 373015122071000 | 204  | 131.4455 | 159.3814 | 109.5215 |
| 48 | 7/7/2022 15:25  | 6.707525 | 374856122210301 | 8.7  | 5.803304 | 6.972251 | 4.890021 |
| 49 | 7/7/2022 12:36  | 4.719361 | 373015122071000 | 6.6  | 6.004341 | 17.69864 | 4.416507 |
| 49 | 7/7/2022 12:37  | 4.560987 | 373015122071000 | 6.3  | 6.004341 | 17.69864 | 4.416507 |
| 50 | 7/7/2022 12:36  | 4.719361 | 373015122071000 | 6.6  | 4.635014 | 4.885296 | 4.416507 |
| 50 | 7/7/2022 12:37  | 4.560987 | 373015122071000 | 6.3  | 4.635014 | 4.885296 | 4.416507 |
| 51 | 7/7/2022 11:25  | 5.479005 | 373336122122501 | 8.1  | 5.571491 | 6.070487 | 4.879152 |
| 52 | 7/7/2022 9:43   | 5.163889 | 373640122170101 | 8.2  | 4.852915 | 5.379167 | 3.470765 |
| 52 | 7/7/2022 9:44   | 4.959522 | 373640122170101 | 8.1  | 4.852915 | 5.379167 | 3.470765 |
| 53 | 7/7/2022 9:43   | 5.163889 | 373640122170101 | 8.2  | 5.034104 | 5.394979 | 4.468292 |
| 53 | 7/7/2022 9:44   | 4.959522 | 373640122170101 | 8.1  | 5.034104 | 5.394979 | 4.468292 |
| 54 | 7/7/2022 10:02  | 8.951517 | 373739122093101 | 11.4 | 10.93483 | 26.95732 | 8.921869 |
| 55 | 7/7/2022 12:08  | 7.16701  | 373158122102701 | 10.8 | 7.438119 | 8.637134 | 5.976632 |
| 56 | 7/7/2022 11:41  | 15.90726 | 373401122092201 | 9    | 15.94318 | 16.902   | 15.25229 |
| 56 | 7/7/2022 11:40  | 16.27786 | 373401122092201 | 9.3  | 15.94318 | 16.902   | 15.25229 |
| 57 | 7/7/2022 11:41  | 15.90726 | 373401122092201 | 9    | 16.64081 | 19.24843 | 15.39182 |
| 57 | 7/7/2022 11:40  | 16.27786 | 373401122092201 | 9.3  | 16.64081 | 19.24843 | 15.39182 |
| 58 | 7/7/2022 10:49  | 8.729254 | 373540122094301 | 15.2 | 9.06249  | 16.15366 | 8.028688 |
| 58 | 7/7/2022 10:49  | 8.729254 | 373540122094301 | 15.2 | 9.06249  | 16.15366 | 8.028688 |
| 59 | 7/7/2022 10:27  | 4.78805  | 11162765        | 7.3  | 4.724371 | 5.537162 | 3.925633 |
| 60 | 7/7/2022 10:13  | 11.04761 | 373642122120401 | 5.9  | 11.55783 | 16.46982 | 9.702572 |
| 61 | 8/31/2022 11:46 | 6.992431 | 373203122080901 | 5.1  | 7.002727 | 7.505891 | 6.284733 |
| 62 | 8/31/2022 10:55 | 6.300641 | 373401122092201 | 3.7  | 7.414585 | 9.138572 | 5.305515 |
| 63 | 8/31/2022 8:02  | 5.17085  | 373920122155201 | 3.4  | 5.357302 | 5.83681  | 4.940201 |
| 64 | 8/10/2022 10:40 | 18.81713 | 373924122185901 | 41.4 | 18.82738 | 20.38074 | 17.45951 |
| 65 | 8/25/2022 12:18 | 116.3317 | 373924122185901 | 94   | 139.2841 | 256.4666 | 94.94665 |
| 66 | 8/10/2022 9:55  | 200.2902 | 374614122181401 | 411  | 213.8788 | 438.2187 | 131.7449 |
| 67 | 8/31/2022 8:38  | 4.849075 | 373751122143601 | 2.5  | 5.128793 | 5.827134 | 4.753127 |
| 67 | 8/31/2022 8:38  | 4.849075 | 373751122143601 | 2.5  | 5.128793 | 5.827134 | 4.753127 |
| 68 | 7/7/2022 8:55   | 24.6774  | 373847122095001 | 11.6 | 29.44093 | 65.11927 | 21.11951 |
| 68 | 7/7/2022 8:54   | 33.35977 | 373847122095001 | 11.9 | 29.44093 | 65.11927 | 21.11951 |
| 69 | 7/7/2022 8:55   | 24.6774  | 373847122095001 | 11.6 | 39.65952 | 68.21735 | 21.45578 |
| 69 | 7/7/2022 8:54   | 33.35977 | 373847122095001 | 11.9 | 39.65952 | 68.21735 | 21.45578 |
| 70 | 7/7/2022 7:46   | 21.98154 | 374027122130401 | 10.7 | 15.49786 | 22.91898 | 5.502942 |

|    |                 |          |                 |      |          |          |          |
|----|-----------------|----------|-----------------|------|----------|----------|----------|
| 70 | 7/7/2022 7:47   | 20.50908 | 374027122130401 | 11   | 15.49786 | 22.91898 | 5.502942 |
| 71 | 7/7/2022 7:46   | 21.98154 | 374027122130401 | 10.7 | 18.20515 | 22.91898 | 5.517248 |
| 71 | 7/7/2022 7:47   | 20.50908 | 374027122130401 | 11   | 18.20515 | 22.91898 | 5.517248 |
| 72 | 7/7/2022 8:30   | 2.747135 | 373920122155201 | 4    | 3.05162  | 4.141319 | 2.386192 |
| 73 | 8/10/2022 9:30  | 9.737258 | 374614122211001 | 27.8 | 11.28993 | 28.82587 | 7.171127 |
| 74 | 8/10/2022 11:02 | 6.443922 | 374027122130401 | 10.9 | 5.864723 | 6.699636 | 4.540286 |
| 75 | 8/25/2022 12:40 | 203.3673 | 374027122130401 | 527  | 224.5958 | 317.8898 | 161.6104 |
| 75 | 8/25/2022 12:41 | 189.8661 | 374027122130401 | 370  | 224.5958 | 317.8898 | 161.6104 |
| 76 | 8/25/2022 12:40 | 203.3673 | 374027122130401 | 527  | 200.3778 | 263.2031 | 161.6104 |
| 76 | 8/25/2022 12:41 | 189.8661 | 374027122130401 | 370  | 200.3778 | 263.2031 | 161.6104 |
| 77 | 8/31/2022 14:17 | 7.61271  | 374856122210301 | 9.9  | 7.438604 | 7.806185 | 6.987359 |
| 77 | 8/31/2022 14:17 | 7.61271  | 374856122210301 | 9.9  | 7.438604 | 7.806185 | 6.987359 |
| 78 | 8/31/2022 11:25 | 6.155436 | 373158122102701 | 4.7  | 6.457762 | 8.377761 | 5.217554 |
| 79 | 8/31/2022 10:24 | 5.185142 | 373540122094301 | 3.4  | 5.092627 | 6.911083 | 4.428774 |
| 80 | 8/25/2022 11:35 | 171.9387 | 373847122095001 | 25.4 | 230.7153 | 289.5894 | 137.8803 |
| 81 | 7/7/2022 9:20   | 3.253522 | 373751122143601 | 3    | 3.30523  | 3.761244 | 2.918789 |
| 82 | 8/31/2022 9:58  | 8.11359  | 11162765        | 5.6  | 7.640471 | 8.176141 | 6.775696 |
| 83 | 8/31/2022 9:18  | 3.817858 | 373739122093101 | 2.3  | 3.745575 | 3.976335 | 3.499933 |
| 84 | 8/31/2022 9:32  | 5.231365 | 373642122120401 | 3.1  | 4.690105 | 5.83606  | 3.089033 |
| 84 | 8/31/2022 9:33  | 5.78798  | 373642122120401 | 3.2  | 4.690105 | 5.83606  | 3.089033 |
| 85 | 8/31/2022 9:32  | 5.231365 | 373642122120401 | 3.1  | 5.209844 | 5.83606  | 3.12306  |
| 85 | 8/31/2022 9:33  | 5.78798  | 373642122120401 | 3.2  | 5.209844 | 5.83606  | 3.12306  |
| 86 | 9/14/2022 7:54  | 8.810679 | 373158122102701 | 7.7  | 7.976931 | 9.770829 | 6.262377 |
| 87 | 9/7/2022 8:02   | 19.08487 | 373158122102701 | 18.3 | 19.54452 | 23.56006 | 17.68317 |
| 88 | 9/14/2022 8:38  | 9.396183 | 11162765        | 12.2 | 9.629542 | 12.69591 | 8.614329 |
| 89 | 8/10/2022 8:28  | 36.92773 | 374740122190601 | 58.4 | 35.34827 | 39.53316 | 32.32409 |
| 90 | 8/10/2022 8:45  | 117.5927 | 374735122164601 | 114  | 108.7634 | 163.5428 | 71.95716 |
| 91 | 7/7/2022 12:17  | 11.79922 | 373203122080901 | 17.2 | 12.17083 | 19.26993 | 7.328162 |
| 91 | 7/7/2022 12:17  | 11.79922 | 373203122080901 | 17.2 | 12.17083 | 19.26993 | 7.328162 |
| 92 | 8/10/2022 9:15  | 36.25364 | 374617122201101 | 70.9 | 31.74156 | 40.01049 | 20.83939 |
| 93 | 9/7/2022 7:24   | 39.45299 | 373015122071000 | 26.7 | 40.0865  | 40.90972 | 37.94054 |

---

**Table S3.** High resolution in-water 300 m median binned matchup chlorophyll fluorescence (fChl) data used for this analysis [28].

| Date   | Latitude (°N) | Longitude (°E) | fChl (µg/L) |
|--------|---------------|----------------|-------------|
| 5/5/21 | 37.560        | -122.207       | 10.138      |
| 5/5/21 | 37.560        | -122.204       | 9.678       |
| 5/5/21 | 37.561        | -122.202       | 10.654      |
| 5/5/21 | 37.561        | -122.199       | 9.580       |
| 5/5/21 | 37.561        | -122.196       | 10.268      |
| 5/5/21 | 37.562        | -122.193       | 10.765      |
| 5/5/21 | 37.562        | -122.190       | 10.181      |
| 5/5/21 | 37.563        | -122.187       | 12.447      |
| 5/5/21 | 37.563        | -122.184       | 14.584      |
| 5/5/21 | 37.563        | -122.181       | 15.893      |
| 5/5/21 | 37.564        | -122.178       | 16.993      |
| 5/5/21 | 37.564        | -122.175       | 18.232      |
| 5/5/21 | 37.565        | -122.173       | 18.671      |
| 5/5/21 | 37.565        | -122.170       | 17.589      |
| 5/5/21 | 37.566        | -122.167       | 18.997      |
| 5/5/21 | 37.566        | -122.164       | 20.288      |
| 5/5/21 | 37.566        | -122.161       | 21.103      |
| 5/5/21 | 37.566        | -122.160       | 25.599      |
| 5/5/21 | 37.564        | -122.161       | 25.982      |
| 5/5/21 | 37.562        | -122.162       | 23.119      |
| 5/5/21 | 37.559        | -122.163       | 22.752      |
| 5/5/21 | 37.557        | -122.164       | 22.776      |
| 5/5/21 | 37.555        | -122.165       | 22.067      |
| 5/5/21 | 37.553        | -122.166       | 20.840      |
| 5/5/21 | 37.551        | -122.167       | 22.406      |
| 5/5/21 | 37.549        | -122.168       | 21.831      |
| 5/5/21 | 37.546        | -122.169       | 21.729      |
| 5/5/21 | 37.544        | -122.170       | 19.792      |
| 5/5/21 | 37.542        | -122.171       | 17.662      |
| 5/5/21 | 37.540        | -122.172       | 16.298      |
| 5/5/21 | 37.538        | -122.173       | 13.168      |
| 5/5/21 | 37.535        | -122.174       | 11.928      |
| 5/5/21 | 37.533        | -122.174       | 11.328      |
| 5/5/21 | 37.532        | -122.175       | 12.853      |
| 5/5/21 | 37.531        | -122.175       | 13.343      |
| 5/5/21 | 37.533        | -122.174       | 12.635      |
| 5/5/21 | 37.533        | -122.171       | 10.051      |
| 5/5/21 | 37.533        | -122.168       | 11.190      |

|         |        |          |        |
|---------|--------|----------|--------|
| 5/5/21  | 37.533 | -122.165 | 11.562 |
| 5/5/21  | 37.533 | -122.162 | 11.686 |
| 5/5/21  | 37.533 | -122.160 | 12.741 |
| 5/5/21  | 37.534 | -122.157 | 15.811 |
| 5/5/21  | 37.534 | -122.154 | 17.805 |
| 5/5/21  | 37.534 | -122.151 | 18.211 |
| 5/5/21  | 37.534 | -122.148 | 19.324 |
| 5/5/21  | 37.534 | -122.145 | 20.145 |
| 5/5/21  | 37.534 | -122.142 | 21.194 |
| 5/5/21  | 37.534 | -122.139 | 21.479 |
| 5/5/21  | 37.534 | -122.136 | 30.490 |
| 5/5/21  | 37.532 | -122.135 | 28.763 |
| 5/5/21  | 37.530 | -122.134 | 26.556 |
| 5/5/21  | 37.528 | -122.133 | 22.136 |
| 5/5/21  | 37.526 | -122.132 | 20.926 |
| 5/5/21  | 37.524 | -122.131 | 18.977 |
| 5/5/21  | 37.521 | -122.130 | 15.628 |
| 5/5/21  | 37.519 | -122.129 | 16.092 |
| 5/5/21  | 37.517 | -122.128 | 18.109 |
| 5/5/21  | 37.515 | -122.127 | 21.610 |
| 5/5/21  | 37.513 | -122.126 | 20.519 |
| 5/5/21  | 37.510 | -122.125 | 18.518 |
| 5/5/21  | 37.508 | -122.124 | 18.408 |
| 5/5/21  | 37.506 | -122.122 | 17.462 |
| 5/5/21  | 37.506 | -122.119 | 19.404 |
| 6/23/21 | 37.560 | -122.205 | 11.467 |
| 6/23/21 | 37.560 | -122.207 | 11.711 |
| 6/23/21 | 37.560 | -122.206 | 12.442 |
| 6/23/21 | 37.562 | -122.204 | 11.827 |
| 6/23/21 | 37.563 | -122.202 | 11.666 |
| 6/23/21 | 37.565 | -122.200 | 11.779 |
| 6/23/21 | 37.567 | -122.198 | 12.099 |
| 6/23/21 | 37.568 | -122.196 | 12.323 |
| 6/23/21 | 37.570 | -122.194 | 12.318 |
| 6/23/21 | 37.572 | -122.192 | 12.188 |
| 6/23/21 | 37.573 | -122.190 | 12.094 |
| 6/23/21 | 37.575 | -122.188 | 12.976 |
| 6/23/21 | 37.577 | -122.186 | 13.200 |
| 6/23/21 | 37.579 | -122.184 | 13.361 |
| 6/23/21 | 37.580 | -122.182 | 13.385 |
| 6/23/21 | 37.582 | -122.180 | 13.669 |
| 6/23/21 | 37.584 | -122.178 | 15.726 |
| 6/23/21 | 37.586 | -122.176 | 16.253 |
| 6/23/21 | 37.587 | -122.174 | 16.327 |

---

|         |        |          |        |
|---------|--------|----------|--------|
| 6/23/21 | 37.589 | -122.172 | 16.477 |
| 6/23/21 | 37.591 | -122.170 | 17.402 |
| 6/23/21 | 37.592 | -122.168 | 19.295 |
| 6/23/21 | 37.592 | -122.169 | 19.589 |
| 6/23/21 | 37.591 | -122.172 | 19.219 |
| 6/23/21 | 37.591 | -122.174 | 19.358 |
| 6/23/21 | 37.590 | -122.177 | 18.668 |
| 6/23/21 | 37.590 | -122.180 | 18.482 |
| 6/23/21 | 37.590 | -122.183 | 18.247 |
| 6/23/21 | 37.589 | -122.186 | 18.010 |
| 6/23/21 | 37.589 | -122.189 | 17.525 |
| 6/23/21 | 37.588 | -122.192 | 17.190 |
| 6/23/21 | 37.588 | -122.195 | 16.662 |
| 6/23/21 | 37.588 | -122.198 | 16.559 |
| 6/23/21 | 37.587 | -122.201 | 16.642 |
| 6/23/21 | 37.587 | -122.204 | 17.103 |
| 6/23/21 | 37.586 | -122.206 | 17.493 |
| 6/23/21 | 37.586 | -122.209 | 17.742 |
| 6/23/21 | 37.586 | -122.212 | 17.737 |
| 6/23/21 | 37.585 | -122.215 | 17.894 |
| 6/23/21 | 37.585 | -122.218 | 18.046 |
| 6/23/21 | 37.585 | -122.221 | 18.067 |
| 8/4/21  | 37.534 | -122.159 | 7.928  |
| 8/4/21  | 37.534 | -122.153 | 7.521  |
| 8/4/21  | 37.534 | -122.150 | 7.299  |
| 8/4/21  | 37.534 | -122.147 | 6.642  |
| 8/4/21  | 37.534 | -122.144 | 7.116  |
| 8/4/21  | 37.534 | -122.141 | 7.843  |
| 8/4/21  | 37.534 | -122.138 | 7.007  |
| 8/4/21  | 37.535 | -122.135 | 6.429  |
| 8/4/21  | 37.535 | -122.132 | 6.027  |
| 8/4/21  | 37.534 | -122.131 | 5.947  |
| 8/4/21  | 37.532 | -122.130 | 5.854  |
| 8/4/21  | 37.530 | -122.129 | 5.578  |
| 8/4/21  | 37.528 | -122.128 | 5.532  |
| 8/4/21  | 37.526 | -122.127 | 5.621  |
| 8/4/21  | 37.524 | -122.126 | 5.581  |
| 8/4/21  | 37.521 | -122.126 | 5.565  |
| 8/4/21  | 37.519 | -122.125 | 5.409  |
| 8/4/21  | 37.517 | -122.124 | 5.498  |
| 8/4/21  | 37.515 | -122.123 | 5.474  |
| 8/4/21  | 37.513 | -122.122 | 5.385  |
| 8/4/21  | 37.510 | -122.121 | 5.211  |
| 8/4/21  | 37.508 | -122.120 | 5.223  |

---



|        |        |          |        |
|--------|--------|----------|--------|
| 8/4/21 | 37.506 | -122.119 | 6.210  |
| 8/4/21 | 37.506 | -122.120 | 6.278  |
| 8/4/21 | 37.508 | -122.122 | 6.296  |
| 8/4/21 | 37.509 | -122.125 | 6.480  |
| 8/4/21 | 37.510 | -122.127 | 7.349  |
| 8/4/21 | 37.512 | -122.129 | 8.865  |
| 8/4/21 | 37.513 | -122.132 | 8.881  |
| 8/4/21 | 37.514 | -122.134 | 8.815  |
| 8/4/21 | 37.515 | -122.137 | 8.704  |
| 8/4/21 | 37.516 | -122.139 | 8.828  |
| 8/4/21 | 37.518 | -122.142 | 9.103  |
| 8/4/21 | 37.519 | -122.144 | 9.274  |
| 8/4/21 | 37.520 | -122.147 | 9.543  |
| 8/4/21 | 37.522 | -122.149 | 9.954  |
| 8/4/21 | 37.523 | -122.151 | 9.960  |
| 8/4/21 | 37.525 | -122.153 | 9.633  |
| 8/4/21 | 37.526 | -122.156 | 9.461  |
| 8/4/21 | 37.528 | -122.158 | 9.351  |
| 8/4/21 | 37.529 | -122.161 | 9.403  |
| 8/4/21 | 37.530 | -122.163 | 9.041  |
| 8/4/21 | 37.531 | -122.165 | 8.659  |
| 8/4/21 | 37.533 | -122.168 | 8.277  |
| 8/4/21 | 37.534 | -122.170 | 8.389  |
| 8/4/21 | 37.536 | -122.172 | 8.447  |
| 8/4/21 | 37.538 | -122.174 | 8.053  |
| 8/4/21 | 37.539 | -122.176 | 7.792  |
| 8/4/21 | 37.541 | -122.178 | 7.664  |
| 8/4/21 | 37.543 | -122.180 | 7.684  |
| 8/4/21 | 37.544 | -122.182 | 7.574  |
| 8/4/21 | 37.546 | -122.184 | 7.275  |
| 8/4/21 | 37.548 | -122.186 | 7.248  |
| 8/4/21 | 37.550 | -122.188 | 7.123  |
| 8/4/21 | 37.552 | -122.190 | 7.129  |
| 8/4/21 | 37.553 | -122.192 | 7.513  |
| 8/4/21 | 37.554 | -122.194 | 9.175  |
| 8/4/21 | 37.555 | -122.197 | 10.846 |
| 8/4/21 | 37.557 | -122.200 | 11.422 |
| 8/4/21 | 37.558 | -122.202 | 11.927 |
| 8/4/21 | 37.559 | -122.205 | 12.199 |
| 8/4/21 | 37.560 | -122.207 | 11.811 |
| 8/4/21 | 37.561 | -122.210 | 11.405 |
| 8/4/21 | 37.562 | -122.212 | 11.189 |
| 8/4/21 | 37.563 | -122.215 | 10.960 |
| 8/4/21 | 37.564 | -122.217 | 10.845 |

---

|        |        |          |        |
|--------|--------|----------|--------|
| 8/4/21 | 37.565 | -122.220 | 10.820 |
| 8/4/21 | 37.567 | -122.222 | 10.921 |
| 8/4/21 | 37.568 | -122.225 | 11.058 |
| 8/4/21 | 37.569 | -122.227 | 11.014 |
| 8/4/21 | 37.571 | -122.229 | 11.142 |
| 8/4/21 | 37.572 | -122.232 | 11.488 |
| 8/4/21 | 37.573 | -122.234 | 11.713 |
| 8/4/21 | 37.575 | -122.236 | 12.270 |
| 8/4/21 | 37.576 | -122.239 | 12.273 |
| 8/4/21 | 37.576 | -122.239 | 12.273 |
| 7/7/22 | 37.588 | -122.205 | 8.102  |
| 7/7/22 | 37.588 | -122.203 | 7.553  |
| 7/7/22 | 37.589 | -122.200 | 6.500  |
| 7/7/22 | 37.589 | -122.197 | 5.377  |
| 7/7/22 | 37.590 | -122.194 | 5.205  |
| 7/7/22 | 37.590 | -122.191 | 4.877  |
| 7/7/22 | 37.590 | -122.188 | 4.282  |
| 7/7/22 | 37.591 | -122.185 | 4.210  |
| 7/7/22 | 37.591 | -122.183 | 4.036  |
| 7/7/22 | 37.592 | -122.180 | 3.986  |
| 7/7/22 | 37.592 | -122.177 | 4.230  |
| 7/7/22 | 37.592 | -122.174 | 4.815  |
| 7/7/22 | 37.592 | -122.171 | 4.580  |
| 7/7/22 | 37.592 | -122.168 | 4.505  |
| 7/7/22 | 37.593 | -122.165 | 4.480  |
| 7/7/22 | 37.594 | -122.163 | 4.552  |
| 7/7/22 | 37.593 | -122.163 | 4.355  |
| 7/7/22 | 37.591 | -122.163 | 4.110  |
| 7/7/22 | 37.589 | -122.166 | 4.121  |
| 7/7/22 | 37.588 | -122.168 | 4.063  |
| 7/7/22 | 37.586 | -122.170 | 4.195  |
| 7/7/22 | 37.585 | -122.172 | 4.406  |
| 7/7/22 | 37.583 | -122.175 | 4.552  |
| 7/7/22 | 37.582 | -122.177 | 4.837  |
| 7/7/22 | 37.581 | -122.179 | 5.015  |
| 7/7/22 | 37.580 | -122.182 | 5.073  |
| 7/7/22 | 37.578 | -122.183 | 5.247  |
| 7/7/22 | 37.576 | -122.185 | 5.661  |
| 7/7/22 | 37.574 | -122.187 | 5.887  |
| 7/7/22 | 37.573 | -122.189 | 5.901  |
| 7/7/22 | 37.572 | -122.192 | 5.967  |
| 7/7/22 | 37.570 | -122.194 | 5.849  |
| 7/7/22 | 37.569 | -122.196 | 5.739  |
| 7/7/22 | 37.567 | -122.198 | 5.427  |

---

|         |        |          |         |
|---------|--------|----------|---------|
| 7/7/22  | 37.566 | -122.200 | 5.095   |
| 7/7/22  | 37.564 | -122.203 | 5.713   |
| 7/7/22  | 37.563 | -122.205 | 10.766  |
| 7/7/22  | 37.561 | -122.206 | 16.314  |
| 7/7/22  | 37.561 | -122.208 | 17.703  |
| 7/7/22  | 37.561 | -122.209 | 17.177  |
| 7/7/22  | 37.560 | -122.207 | 16.274  |
| 7/7/22  | 37.559 | -122.204 | 15.890  |
| 7/7/22  | 37.559 | -122.201 | 15.901  |
| 7/7/22  | 37.559 | -122.199 | 15.546  |
| 7/7/22  | 37.560 | -122.196 | 15.565  |
| 7/7/22  | 37.560 | -122.193 | 16.099  |
| 7/7/22  | 37.560 | -122.191 | 16.581  |
| 7/7/22  | 37.560 | -122.188 | 16.403  |
| 7/7/22  | 37.560 | -122.185 | 16.528  |
| 7/7/22  | 37.561 | -122.182 | 12.905  |
| 7/7/22  | 37.562 | -122.180 | 8.769   |
| 8/10/22 | 37.770 | -122.305 | 163.696 |
| 8/10/22 | 37.769 | -122.306 | 65.567  |
| 8/10/22 | 37.769 | -122.309 | 69.179  |
| 8/10/22 | 37.767 | -122.309 | 50.150  |
| 8/10/22 | 37.766 | -122.304 | 42.568  |
| 8/10/22 | 37.766 | -122.301 | 41.958  |
| 8/10/22 | 37.765 | -122.292 | 56.532  |
| 8/10/22 | 37.764 | -122.289 | 57.844  |
| 8/10/22 | 37.763 | -122.284 | 74.164  |
| 8/10/22 | 37.763 | -122.281 | 83.108  |
| 8/10/22 | 37.758 | -122.268 | 90.706  |
| 8/10/22 | 37.758 | -122.266 | 70.465  |
| 8/10/22 | 37.756 | -122.263 | 96.145  |
| 8/10/22 | 37.755 | -122.261 | 117.040 |
| 8/10/22 | 37.754 | -122.258 | 107.229 |
| 8/10/22 | 37.752 | -122.256 | 87.228  |
| 8/10/22 | 37.750 | -122.254 | 84.143  |
| 8/10/22 | 37.749 | -122.252 | 90.447  |
| 8/10/22 | 37.748 | -122.249 | 118.339 |
| 8/10/22 | 37.749 | -122.246 | 84.572  |
| 8/10/22 | 37.749 | -122.242 | 87.281  |
| 8/10/22 | 37.748 | -122.245 | 75.915  |
| 8/10/22 | 37.749 | -122.251 | 98.486  |
| 8/10/22 | 37.748 | -122.253 | 120.061 |
| 8/10/22 | 37.745 | -122.261 | 247.447 |
| 8/10/22 | 37.742 | -122.266 | 282.506 |
| 8/10/22 | 37.741 | -122.267 | 197.128 |

---

|         |        |          |         |
|---------|--------|----------|---------|
| 8/10/22 | 37.739 | -122.269 | 197.118 |
| 8/10/22 | 37.732 | -122.271 | 105.642 |
| 8/10/22 | 37.730 | -122.272 | 116.092 |
| 8/10/22 | 37.728 | -122.273 | 170.588 |
| 8/10/22 | 37.721 | -122.276 | 82.778  |
| 8/10/22 | 37.719 | -122.277 | 81.421  |
| 8/10/22 | 37.717 | -122.278 | 85.150  |
| 8/10/22 | 37.715 | -122.279 | 72.324  |
| 8/10/22 | 37.713 | -122.281 | 65.149  |
| 8/10/22 | 37.710 | -122.282 | 62.906  |
| 8/10/22 | 37.708 | -122.283 | 63.178  |
| 8/10/22 | 37.706 | -122.284 | 67.514  |
| 8/10/22 | 37.704 | -122.285 | 85.015  |
| 8/10/22 | 37.702 | -122.286 | 88.616  |
| 8/10/22 | 37.700 | -122.288 | 64.790  |
| 8/10/22 | 37.698 | -122.289 | 58.360  |
| 8/10/22 | 37.695 | -122.289 | 54.055  |
| 8/10/22 | 37.693 | -122.290 | 43.934  |
| 8/25/22 | 37.691 | -122.292 | 34.578  |
| 8/25/22 | 37.689 | -122.293 | 24.973  |
| 8/25/22 | 37.687 | -122.294 | 28.401  |
| 8/25/22 | 37.601 | -122.221 | 38.678  |
| 8/25/22 | 37.602 | -122.219 | 41.882  |
| 8/25/22 | 37.604 | -122.216 | 44.748  |
| 8/25/22 | 37.607 | -122.209 | 46.798  |
| 8/25/22 | 37.609 | -122.207 | 34.376  |
| 8/25/22 | 37.610 | -122.204 | 35.021  |
| 8/25/22 | 37.611 | -122.199 | 35.894  |
| 8/25/22 | 37.613 | -122.196 | 34.698  |
| 8/25/22 | 37.614 | -122.194 | 36.746  |
| 8/25/22 | 37.615 | -122.191 | 36.930  |
| 8/25/22 | 37.617 | -122.186 | 36.974  |
| 8/25/22 | 37.618 | -122.184 | 38.550  |
| 8/25/22 | 37.619 | -122.181 | 39.453  |
| 8/25/22 | 37.620 | -122.179 | 43.056  |
| 8/25/22 | 37.621 | -122.176 | 44.083  |
| 8/25/22 | 37.622 | -122.173 | 45.511  |
| 8/25/22 | 37.624 | -122.168 | 49.909  |
| 8/25/22 | 37.625 | -122.165 | 52.763  |
| 8/31/22 | 37.626 | -122.163 | 54.796  |
| 8/31/22 | 37.627 | -122.160 | 103.559 |
| 8/31/22 | 37.626 | -122.165 | 81.869  |
| 8/31/22 | 37.592 | -122.242 | 6.746   |
| 8/31/22 | 37.591 | -122.245 | 6.941   |

---

|         |        |          |        |
|---------|--------|----------|--------|
| 8/31/22 | 37.590 | -122.247 | 7.317  |
| 8/31/22 | 37.588 | -122.248 | 7.740  |
| 8/31/22 | 37.586 | -122.250 | 7.819  |
| 8/31/22 | 37.584 | -122.251 | 7.608  |
| 8/31/22 | 37.584 | -122.249 | 7.859  |
| 8/31/22 | 37.583 | -122.248 | 7.634  |
| 8/31/22 | 37.582 | -122.247 | 7.208  |
| 8/31/22 | 37.581 | -122.247 | 7.709  |
| 8/31/22 | 37.581 | -122.246 | 7.582  |
| 8/31/22 | 37.582 | -122.247 | 7.799  |
| 8/31/22 | 37.584 | -122.246 | 7.858  |
| 8/31/22 | 37.585 | -122.243 | 7.959  |
| 8/31/22 | 37.585 | -122.240 | 8.559  |
| 8/31/22 | 37.586 | -122.237 | 8.785  |
| 8/31/22 | 37.586 | -122.234 | 7.856  |
| 8/31/22 | 37.586 | -122.231 | 5.698  |
| 8/31/22 | 37.587 | -122.228 | 5.307  |
| 8/31/22 | 37.587 | -122.225 | 5.534  |
| 8/31/22 | 37.587 | -122.223 | 5.535  |
| 8/31/22 | 37.588 | -122.220 | 5.578  |
| 8/31/22 | 37.588 | -122.217 | 6.042  |
| 8/31/22 | 37.588 | -122.214 | 6.640  |
| 8/31/22 | 37.588 | -122.211 | 6.736  |
| 8/31/22 | 37.589 | -122.208 | 6.906  |
| 8/31/22 | 37.589 | -122.205 | 6.445  |
| 8/31/22 | 37.589 | -122.202 | 6.164  |
| 8/31/22 | 37.590 | -122.199 | 6.339  |
| 8/31/22 | 37.590 | -122.196 | 6.427  |
| 8/31/22 | 37.590 | -122.193 | 6.394  |
| 8/31/22 | 37.590 | -122.190 | 6.582  |
| 8/31/22 | 37.591 | -122.188 | 6.868  |
| 8/31/22 | 37.591 | -122.185 | 5.423  |
| 8/31/22 | 37.592 | -122.182 | 4.657  |
| 9/7/22  | 37.592 | -122.179 | 4.456  |
| 9/7/22  | 37.592 | -122.176 | 4.654  |
| 9/7/22  | 37.592 | -122.174 | 5.056  |
| 9/7/22  | 37.628 | -122.246 | 9.672  |
| 9/7/22  | 37.629 | -122.244 | 8.378  |
| 9/7/22  | 37.630 | -122.244 | 8.538  |
| 9/7/22  | 37.630 | -122.242 | 7.892  |
| 9/7/22  | 37.630 | -122.239 | 10.716 |
| 9/7/22  | 37.631 | -122.237 | 12.424 |
| 9/7/22  | 37.632 | -122.234 | 20.819 |
| 9/7/22  | 37.633 | -122.231 | 26.202 |

---

|         |        |          |        |
|---------|--------|----------|--------|
| 9/7/22  | 37.634 | -122.229 | 35.559 |
| 9/7/22  | 37.635 | -122.226 | 31.460 |
| 9/7/22  | 37.636 | -122.224 | 20.499 |
| 9/7/22  | 37.637 | -122.221 | 19.193 |
| 9/7/22  | 37.638 | -122.218 | 20.956 |
| 9/7/22  | 37.639 | -122.216 | 15.889 |
| 9/7/22  | 37.640 | -122.213 | 11.644 |
| 9/7/22  | 37.641 | -122.211 | 11.241 |
| 9/7/22  | 37.642 | -122.208 | 13.912 |
| 9/7/22  | 37.643 | -122.205 | 18.120 |
| 9/7/22  | 37.643 | -122.202 | 24.250 |
| 9/7/22  | 37.644 | -122.200 | 22.792 |
| 9/7/22  | 37.645 | -122.197 | 22.800 |
| 9/7/22  | 37.646 | -122.194 | 23.410 |
| 9/7/22  | 37.646 | -122.191 | 22.600 |
| 9/7/22  | 37.646 | -122.188 | 20.648 |
| 9/7/22  | 37.646 | -122.186 | 18.732 |
| 9/7/22  | 37.646 | -122.185 | 18.649 |
| 9/7/22  | 37.645 | -122.182 | 20.408 |
| 9/7/22  | 37.645 | -122.180 | 18.777 |
| 9/7/22  | 37.645 | -122.177 | 17.752 |
| 9/7/22  | 37.644 | -122.174 | 16.893 |
| 9/7/22  | 37.644 | -122.171 | 16.782 |
| 9/14/22 | 37.644 | -122.168 | 17.012 |
| 9/14/22 | 37.645 | -122.166 | 14.117 |
| 9/14/22 | 37.645 | -122.166 | 13.972 |
| 9/14/22 | 37.645 | -122.234 | 3.342  |
| 9/14/22 | 37.646 | -122.237 | 2.806  |
| 9/14/22 | 37.646 | -122.240 | 2.789  |
| 9/14/22 | 37.646 | -122.242 | 2.725  |
| 9/14/22 | 37.647 | -122.245 | 2.849  |
| 9/14/22 | 37.648 | -122.248 | 3.497  |
| 9/14/22 | 37.649 | -122.251 | 4.374  |
| 9/14/22 | 37.650 | -122.253 | 4.732  |
| 9/14/22 | 37.651 | -122.256 | 5.267  |
| 9/14/22 | 37.651 | -122.259 | 6.632  |
| 9/14/22 | 37.651 | -122.261 | 7.936  |
| 9/14/22 | 37.651 | -122.263 | 9.709  |
| 9/14/22 | 37.650 | -122.265 | 10.073 |
| 9/14/22 | 37.650 | -122.268 | 9.262  |
| 9/14/22 | 37.650 | -122.271 | 10.370 |
| 9/14/22 | 37.651 | -122.274 | 11.438 |
| 9/14/22 | 37.651 | -122.277 | 10.712 |
| 9/14/22 | 37.652 | -122.280 | 15.448 |

---

|         |        |          |        |
|---------|--------|----------|--------|
| 9/14/22 | 37.652 | -122.283 | 11.840 |
| 9/14/22 | 37.652 | -122.285 | 10.642 |
| 9/14/22 | 37.652 | -122.288 | 8.654  |
| 9/14/22 | 37.651 | -122.291 | 10.205 |
| 9/14/22 | 37.651 | -122.294 | 8.150  |
| 9/14/22 | 37.651 | -122.297 | 7.388  |
| 9/14/22 | 37.651 | -122.300 | 7.190  |
| 9/14/22 | 37.651 | -122.303 | 12.601 |
| 9/14/22 | 37.651 | -122.306 | 14.458 |
| 9/14/22 | 37.653 | -122.308 | 13.218 |
| 9/14/22 | 37.654 | -122.311 | 13.642 |
| 9/14/22 | 37.655 | -122.313 | 13.607 |
| 9/14/22 | 37.656 | -122.316 | 12.331 |
| 9/14/22 | 37.656 | -122.317 | 11.347 |
| 9/14/22 | 37.656 | -122.316 | 11.361 |
| 9/14/22 | 37.656 | -122.314 | 12.050 |
| 9/14/22 | 37.658 | -122.312 | 12.715 |
| 9/14/22 | 37.659 | -122.310 | 14.492 |
| 9/14/22 | 37.659 | -122.307 | 14.228 |
| 9/14/22 | 37.660 | -122.304 | 12.830 |
| 9/14/22 | 37.661 | -122.302 | 11.273 |
| 9/14/22 | 37.662 | -122.299 | 7.650  |
| 9/14/22 | 37.663 | -122.296 | 7.679  |
| 9/14/22 | 37.664 | -122.293 | 9.411  |
| 9/14/22 | 37.665 | -122.291 | 6.248  |
| 9/14/22 | 37.665 | -122.288 | 9.514  |
| 9/14/22 | 37.665 | -122.285 | 8.842  |
| 9/14/22 | 37.665 | -122.282 | 6.899  |
| 9/14/22 | 37.666 | -122.279 | 9.238  |
| 9/14/22 | 37.666 | -122.276 | 10.324 |
| 9/14/22 | 37.667 | -122.274 | 13.119 |
| 9/14/22 | 37.668 | -122.271 | 7.176  |
| 9/14/22 | 37.669 | -122.268 | 5.459  |
| 9/14/22 | 37.669 | -122.265 | 4.207  |
| 9/14/22 | 37.669 | -122.263 | 3.759  |

---
